# Supplementary material for: Fragmentation and Coverage Variation in Viral Metagenome Assemblies, and Their Effect in Diversity Calculations
Source: Front Bioeng Biotechnol. 2015 Sep 17;3:141. doi: 10.3389/fbioe.2015.00141 (PMC4585024; doi:10.3389/fbioe.2015.00141)
Supplement: Supplementary file 3 [file Table_3.XLSX]

## Sheet: Sheet1
Assembler	N50	Largest_contig	Num_contig	%.Chim_gi	%.Chim_Species	%.Chim_genus	%.Chim_family	%.Chim_order	Mean_Fragmentation	Mean_contig_coverage	$% Reads Assembled	Contig Expected Species	Contig_shannon	Contig_chao	Contig_ace	GI_specSpecies	GI_shannon	GI_chao	GI_ace	PHACCS_shannon
RayMeta	3382.33±3913.72	142427.33±100145.59	7317.33±6502.54	6.78±4.35	6.76±4.33	1.20±0.96	0.98±0.80	0.94±0.77	0.0078±0.0011	76.62±101.14†	67.65±26.51	5716.67±5351.42	6.54±0.89	5722.87±5352.70	5717.72±5352.12	201.67±191.68	3.09±0.62	224.57±203.35	208.63±195.03	1.10±0.35
Meta-IDBA	1559.00±1054.21	72210.00±65641.85	10396.33±7578.05	4.71±1.22	4.68±1.19	1.20±0.27	1.02±0.35	0.95±0.36	0.0079±0.0008	18.94±21.40	57.16±11.28	9316.33±6944.72	7.77±0.58*	9325.07±6944.82	9319.00±6944.74	254.67±196.51	4.00±1.23	342.79±149.11	272.79±191.14	3.22±3.59
SOAPdenovo	1442.67±947.96	139657.33±104235.72	9393.33±8977.70	3.20±1.55	3.18±1.54	0.66±0.31	0.56±0.27	0.53±0.27	0.0078±0.0011	23.96±21.43	51.94±13.75	7643.33±7653.97	7.27±1.08	7643.75±7653.68	7643.71±7653.76	205.33±188.60	3.80±1.37	241.00±198.41	213.39±190.70	2.02±1.37*
CLC	3736.33±3740.73	142516.67±100054.55	7491.00±4734.90	8.04±1.65	8.00±1.64	1.65±0.04	1.33±0.17	1.21±0.16	0.0095±0.0020	63.10±90.13*	79.23±14.28	7134.67±4505.25	7.26±0.6	7135.90±4506.04	7135.62±4505.85	272.00±195.28*	3.45±0.44	312.93±195.45	288.31±191.54*	1.45±0.37
Velvet	947.67±291.66	23295.33±8991.18	13001.33±11094.67*	1.66±0.90*	1.64±0.91*	0.41±0.24*	0.35±0.24*	0.34±0.25*	0.0072±0.0003	5.77±5.53	29.69±11.75	10921.33±9842.73*	8.24±1.19	10925.43±9845.34*	10923.00±9843.31*	234.67±190.06	4.48±1.36*	290.41±194.49	252.85±190.30	1.16±0.48
Metavelvet	7732.33±10996.70*	119872.00±85174.46	4559.67±3283.68	3.74±0.97	3.74±0.96	0.88±0.04	0.80±0.05	0.74±0.04	0.0072±0.0009	25.68±33.00	51.43±5.26	4037.00±2830.01	7.18±0.61	4037.13±2830.20	4037.18±2830.27	203.00±148.11	4.02±1.28	244.86±151.97	213.72±149.25	1.29±0.34
MIRA	617.00±120.20	84426.00±60399.42	66000.00±92479.55†	6.26±2.85	6.23±2.82	1.52±0.84	1.15±0.45	1.05±0.35	0.0071±0.0003	36.46±46.25	44.02±11.32	33210.67±45883.63†	8.77±1.82†	33280.44±45986.72†	33222.01±45899.56†	217.67±196.67	3.42±0.69	259.47±228.06	227.83±199.38	3.32±3.61†
SPAdes	5386.00±6913.25	142530.67±100026.33*	9131.00±4255.80	11.54±3.24	11.49±3.22	3.34±1.58	2.66±1.23	2.14±0.79	0.0097±0.0015*	62.86±91.60	82.96±11.81*†	8591.00±4002.12	7.30±1.06	8599.93±4006.44	8595.12±4003.88	291.00±192.50*	3.51±0.39	352.07±166.17	315.08±180.24*	2.07±1.23
MEGAHIT	1990.67±1326.71	130351.00±83548.39	12568.33±10275.10	6.51±1.46	6.48±1.47	1.51±0.27	1.28±0.24	1.17±0.24	0.0093±0.0021	29.44±36.29	65.41±11.08	10421.00±8123.20	7.73±0.49	10425.41±8122.57	10423.11±8123.42	284.00±205.81	3.89±0.88	346.11±206.08*	303.59±201.78	1.18±0.13
Ideal Assembly	10916.33±16350.99	184872.00±165096.18	13169.33±4280.30	0.00±0.00	0.00±0.00	0.00±0.00	0.00±0.00	0.00±0.00	0.2803±0.2739	69.68±103.15	97.25±3.82	13169.33±4280.30	7.77±1.78	13169.33±4280.30	13169.33±4280.30	568.00±17.32	5.56±0.30	1405.93±1175.56	812.15±381.95	2.23±1.17
p value	0.822	1	0.84	0.107	0.107	0.066	0.06	0.076	0.299	0.463	0.047	0.862	0.577	0.862	0.862	0.269	0.737	0.859	0.372	0.627
q value	0.907	1	0.907	0.357	0.357	0.357	0.357	0.357	0.747	0.907	0.357	0.907	0.907	0.907	0.907	0.747	0.907	0.907	0.827	0.907
†	Value exceeds the optimal
*	Closest to the optimal
	Red values indicate the highest value in a column
	Blue values indicate the lowest value in a column
